# Supplementary material for: Probing the effect of substituted groups on sensory properties based on single-crystalline micro/nanostructures of perylenediimide dyes
Source: Royal Society of Chemistry journal article supplement (doi:10.1039/c2nj20811c), 2012-01-01
Supplement: c2nj20811c.pdf [file c2nj20811c.pdf]

# Electronic Supplementary Information for

## Probing the Effect of Substituted Groups on Sensory Properties Based on Single-Crystalline Micro/Nanostructures of Perylenediimide Dyes

*Yongwei Huang,<sup>\*,a</sup> Lina Fu,<sup>b</sup> Wenjun Zou,<sup>c</sup> Fuli Zhang,<sup>a</sup>*

<sup>a</sup> Medical College, Henan University, Kaifeng 475004, China,

<sup>b</sup> Pharmaceutical College, Henan University, Kaifeng 475004, China,

<sup>c</sup> National Center for Nanoscience and Technology of China, Beijing 100190, China,

Corresponding author. E-mail: [hywei79@126.com](mailto:hywei79@126.com)

## Supporting Figures

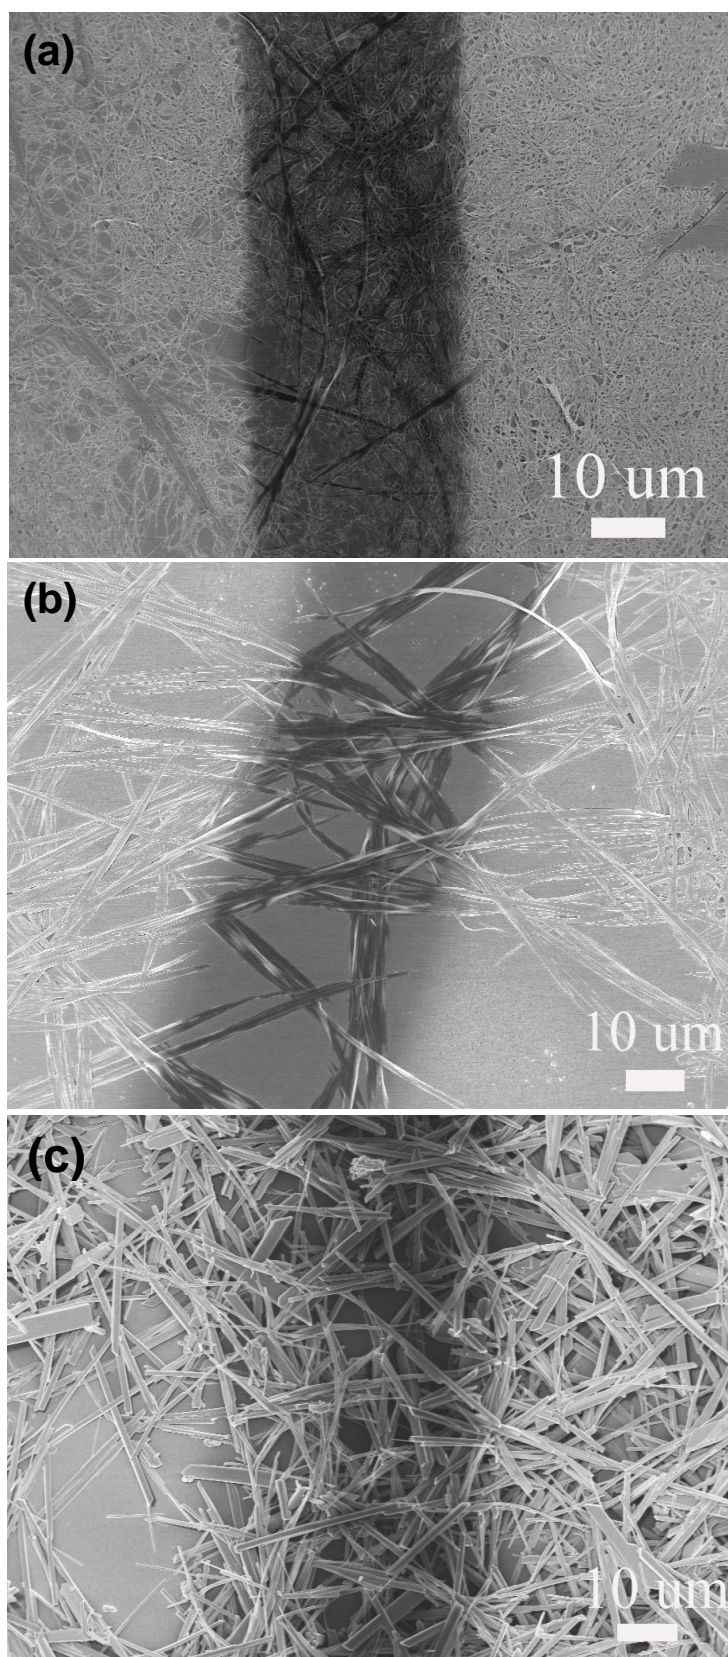

**Fig. S1** SEM images of gas sensor devices of (a) **PTCDI-C<sub>12</sub>**, (b) **PTCDI-ClC<sub>12</sub>** and (c) **PTCDI-ClC<sub>4</sub>F<sub>7</sub>**.

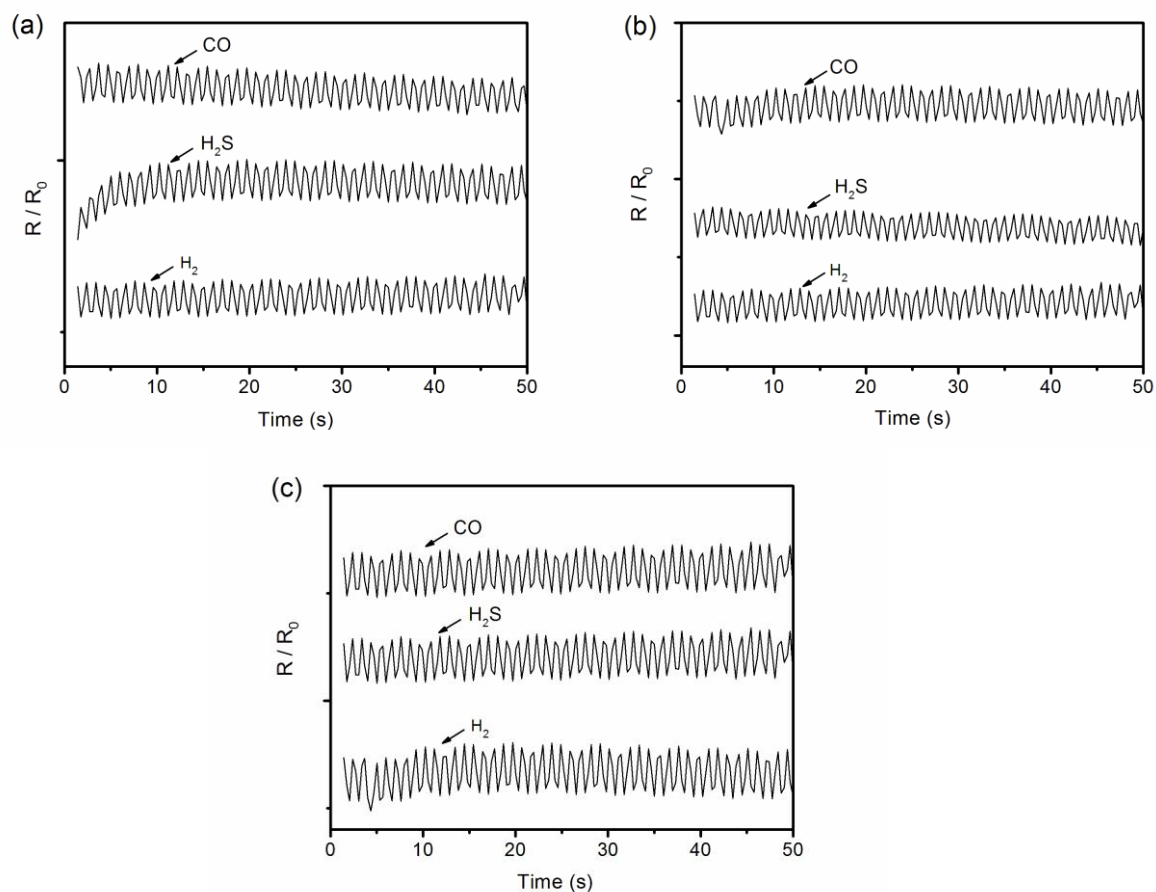

**Fig. S2** Resistance modulation ( $R/R_0$ )-time ( $t$ ) curves of (a) **PTCDI-ClC<sub>12</sub>**, (b) **PTCDI-ClC<sub>4</sub>F<sub>7</sub>** and (c) **PTCDI-C<sub>12</sub>** gas sensors in CO,  $H_2S$  and  $H_2$ , respectively.

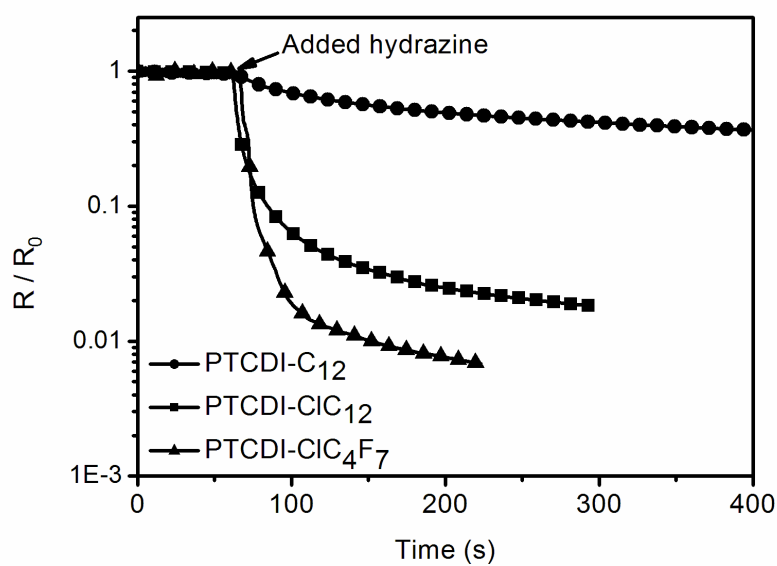

**Fig. S3** Resistance modulation ( $R/R_0$ )-time ( $t$ ) curves of **PTCDI-ClC<sub>12</sub>**, **PTCDI-ClC<sub>4</sub>F<sub>7</sub>** and **PTCDI-C<sub>12</sub>** gas sensors in hydrazine vapor (8 ppm).

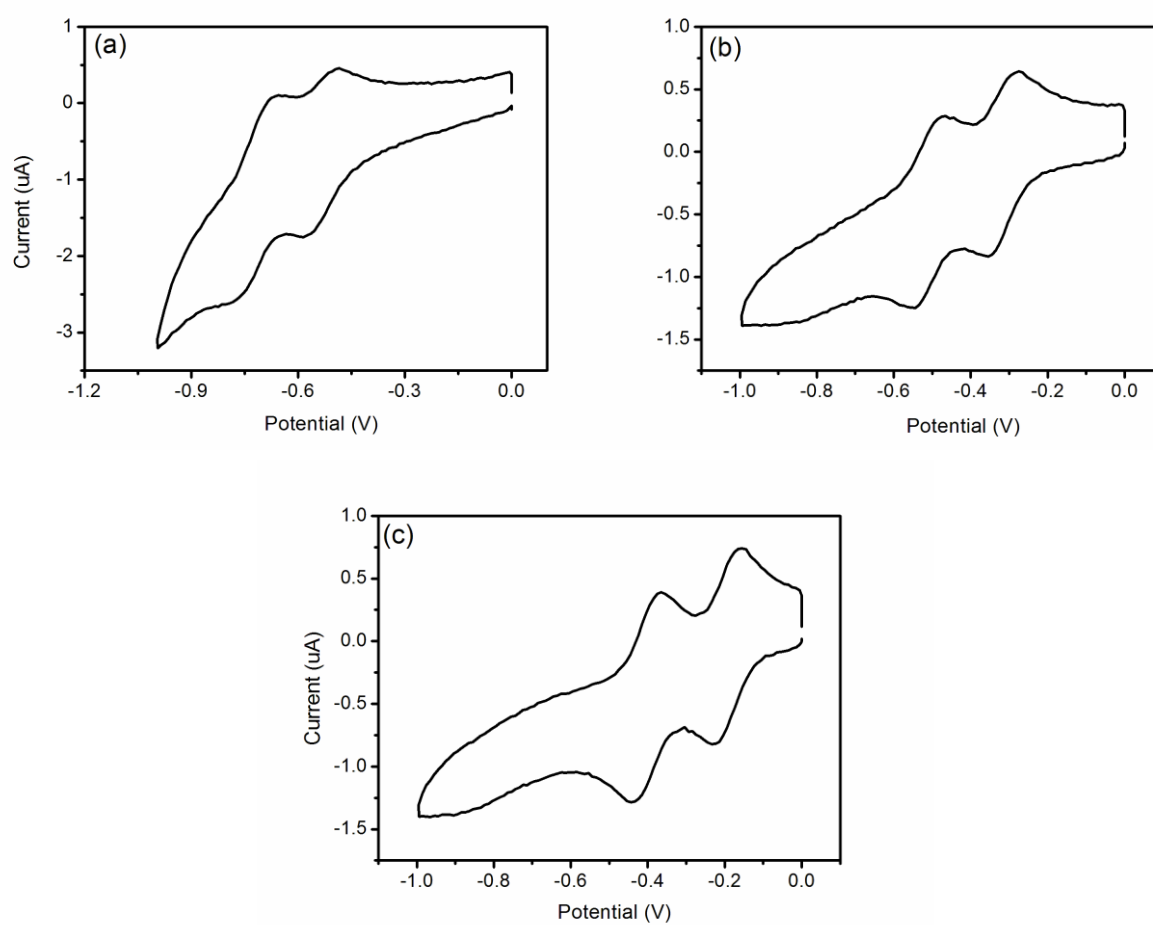

**Fig. S4** Cyclic voltammograms of reduction potentials for (a) **PTCDI-C<sub>12</sub>**, (b) **PTCDI-CIC<sub>12</sub>** and (c) **PTCDI-CIC<sub>4</sub>F<sub>7</sub>** in dichloromethane-TBAPF<sub>6</sub> (scan speed 100 mV s<sup>-1</sup>).

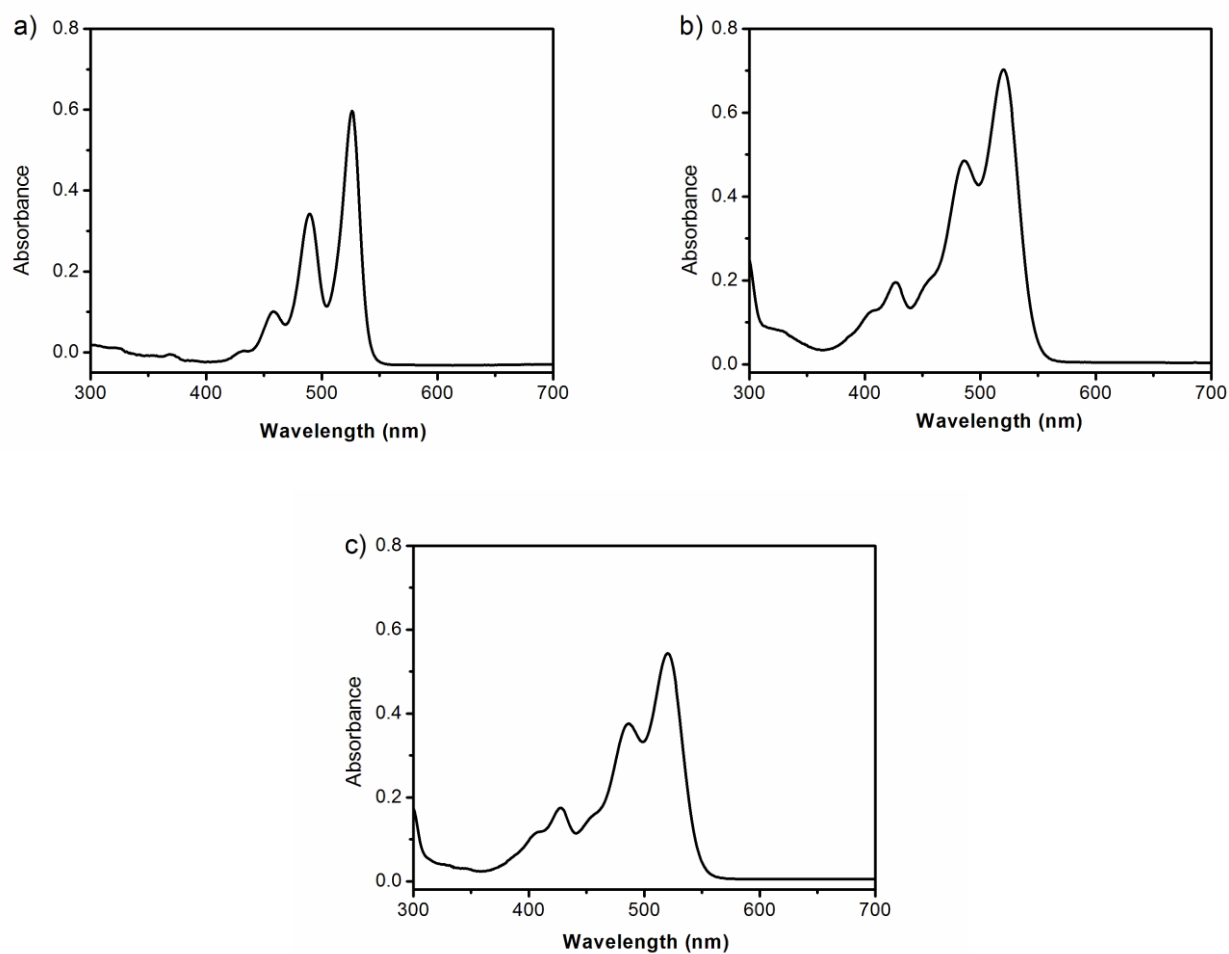

**Fig. S5** UV-vis spectra of (a) PTCDI-C<sub>12</sub>, (b) PTCDI-ClC<sub>12</sub> and (c) PTCDI-ClC<sub>4</sub>F<sub>7</sub> in CH<sub>2</sub>Cl<sub>2</sub>.
